# Supplementary material
Source: PubMed Central journal article supplement (PMC7571547)

Full unedited gel for Figure 1, Panel A right Atrium and Sup Fig 5, Panel A

ZO-1

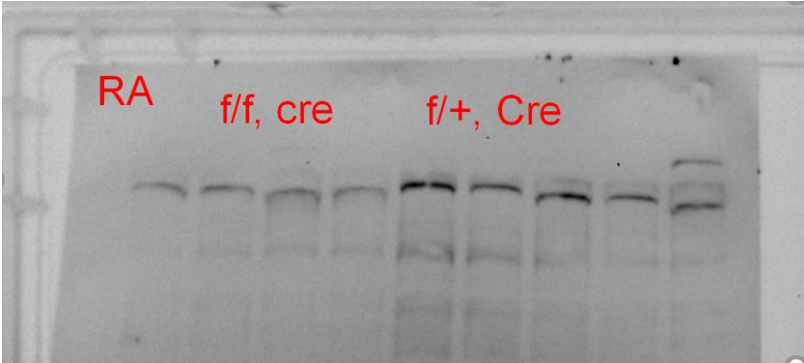

GAPDH (also for ZO-2 in sup fig 5, CX45 in fig 7A, CAR in sup fig 9 A, RA)

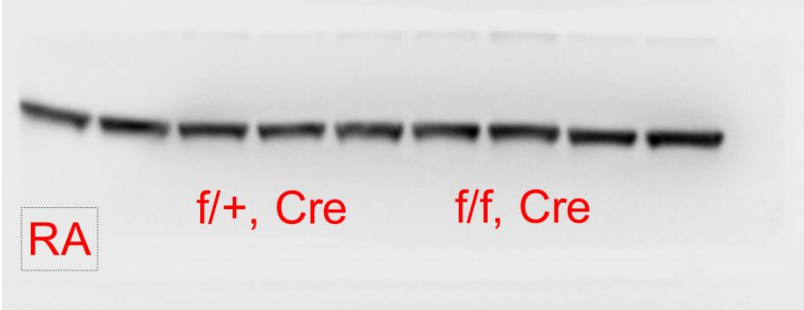

Full unedited gel for Figure 1, Panel A Left Atrium and Sup Fig 5, Panel A

ZO-1

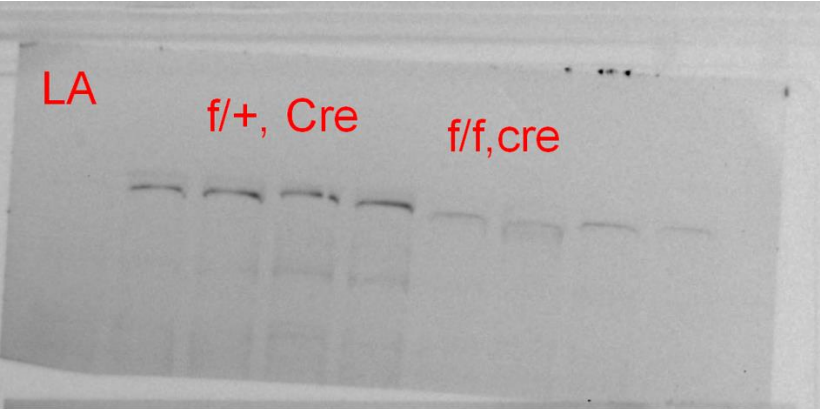

GAPDH (also for ZO-2 in sup fig 5, CX45 in fig 7A, CAR in sup fig 9 A, LA)

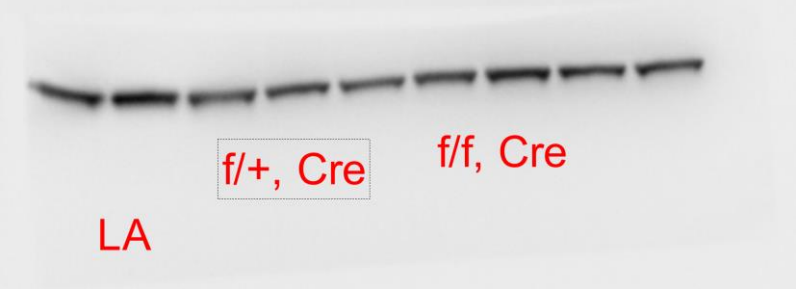

Full unedited gel for Figure 1, Panel A Right Ventricle and Sup Fig 5, Panel A

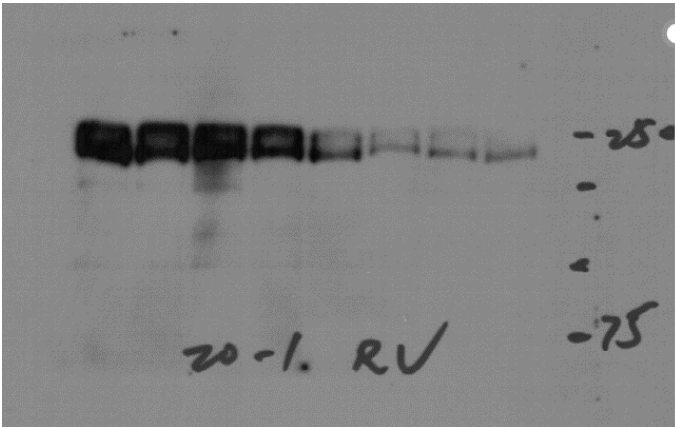

Also for ZO-2 in sup fig 5

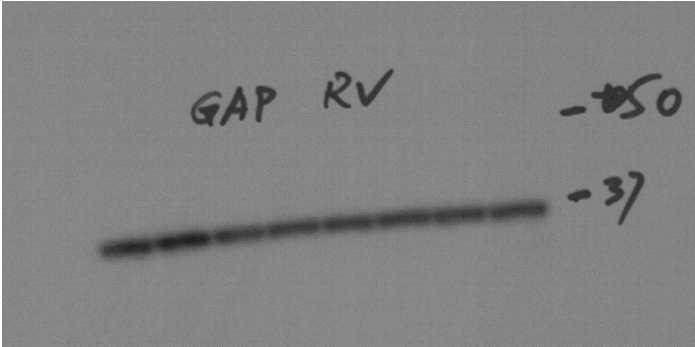

Full unedited gel for Figure 1, Panel A Left Ventricle and Sup Fig 5, Panel A

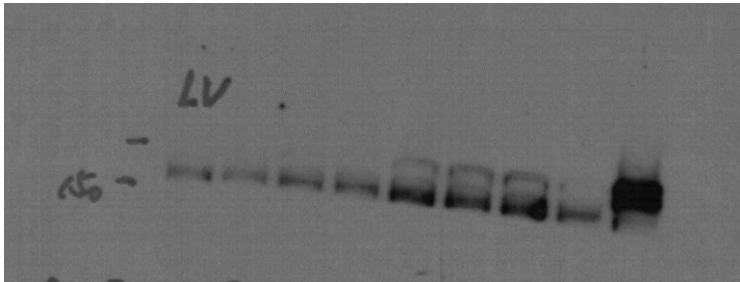

Also for ZO-2 in sup fig 5

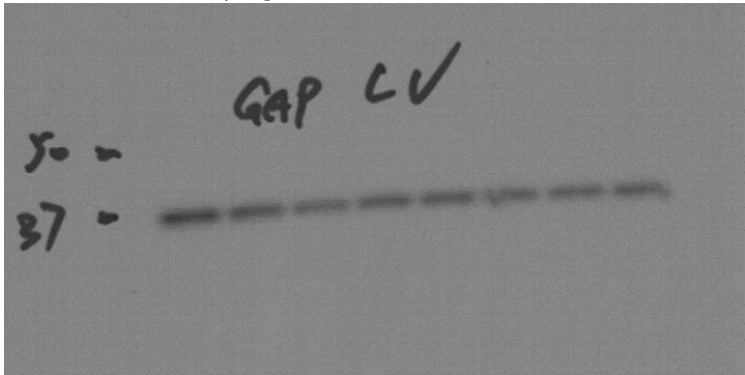

**Full unedited gel for Figure 1, Panel B**

ZO-1

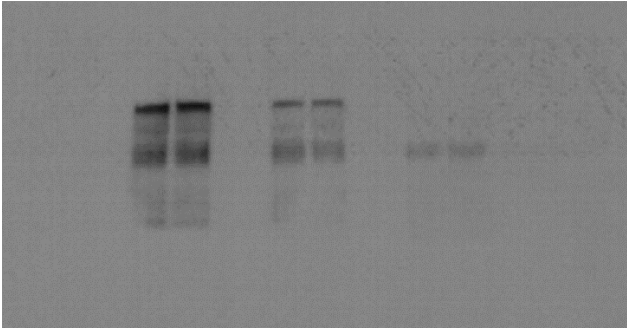

GAPDH

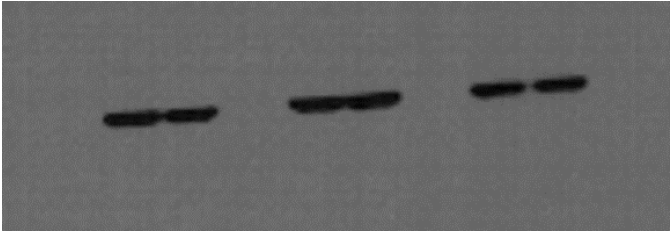

Full unedited gel for Figure 7 Panel A

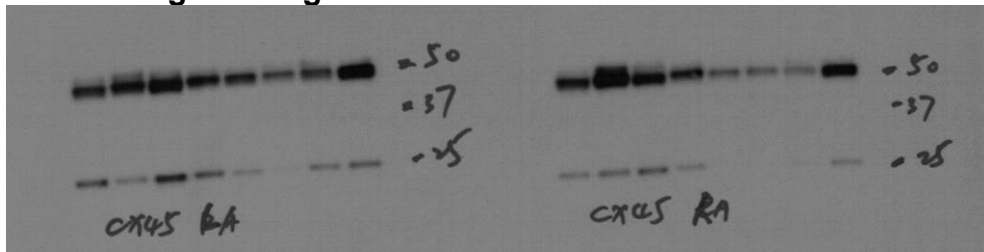

GAPDH (the same to Fig 1A LA)

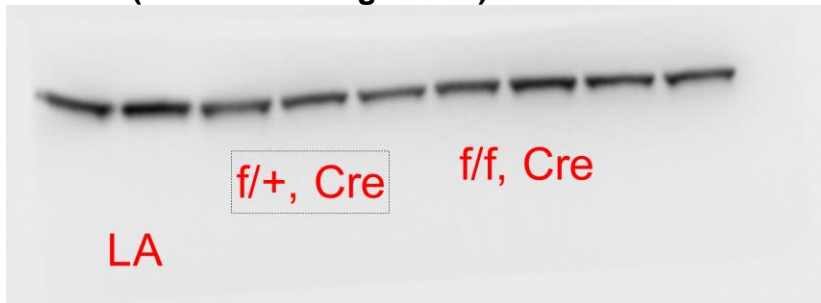

GAPDH ( the same to Fig 1A RA)

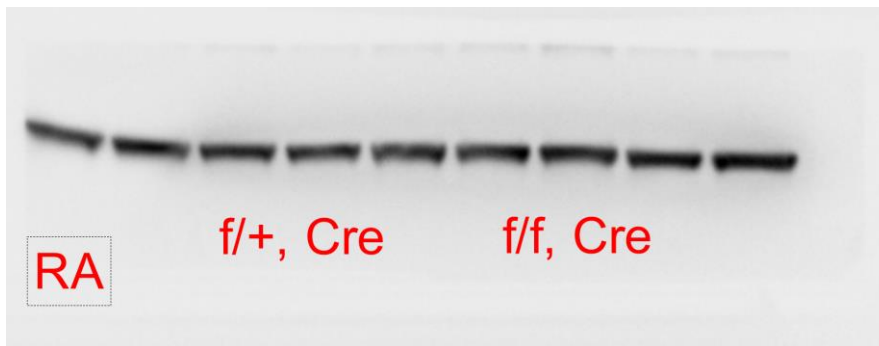

Full unedited gel for Figure 7 Panel D

ZO-1

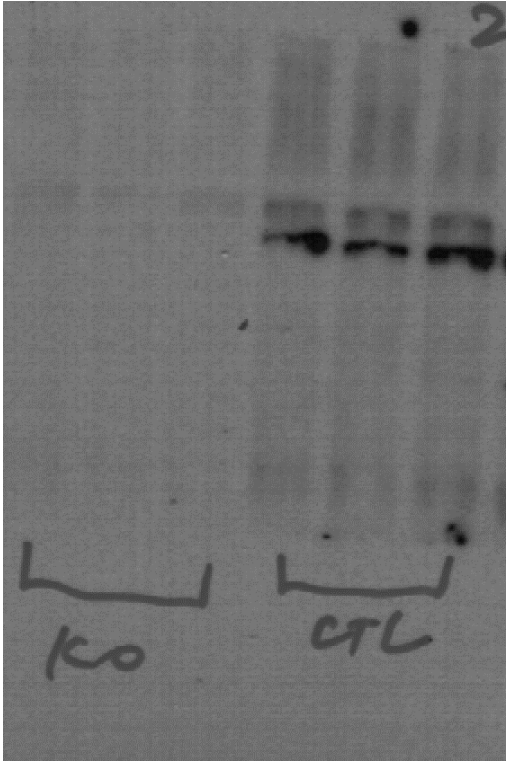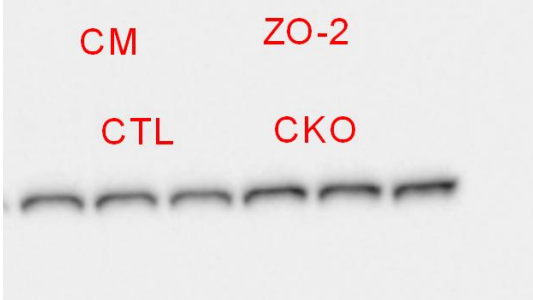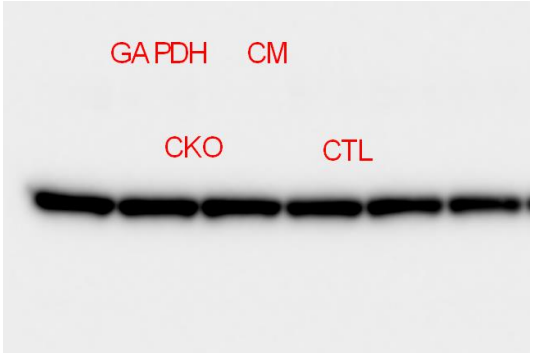

Full unedited gel for Sup. Fig 5 Panel A, ZO-2

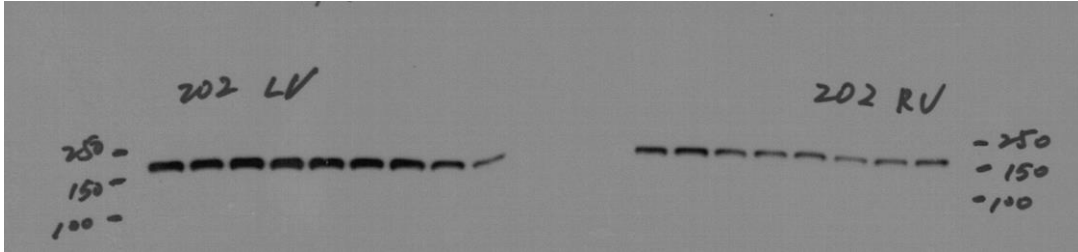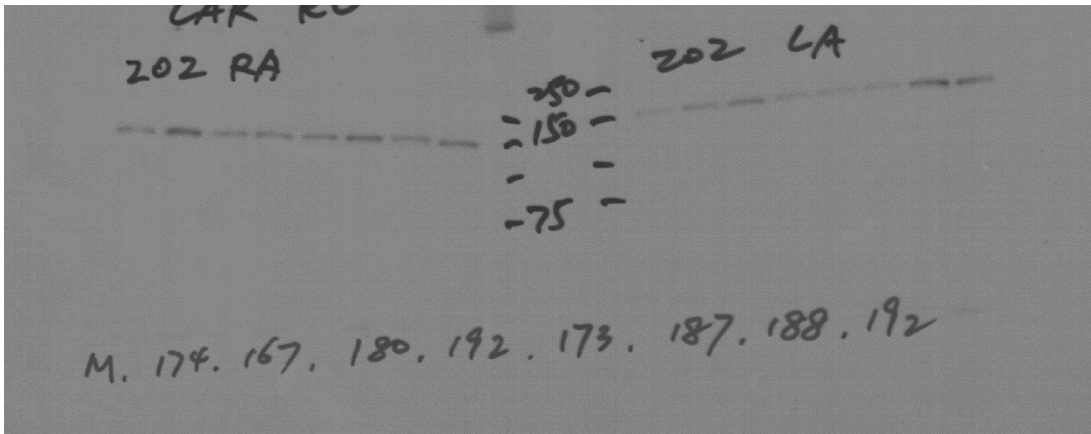



Full unedited gel for Sup. Fig 5 Panel A, VCL

Vinculin

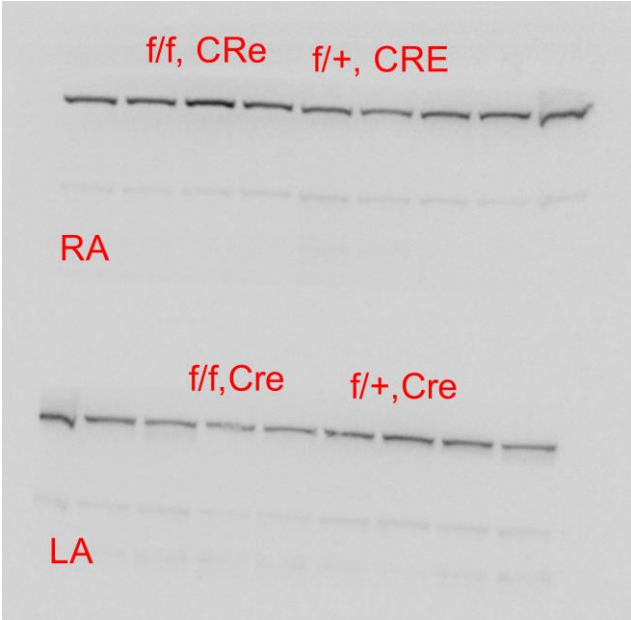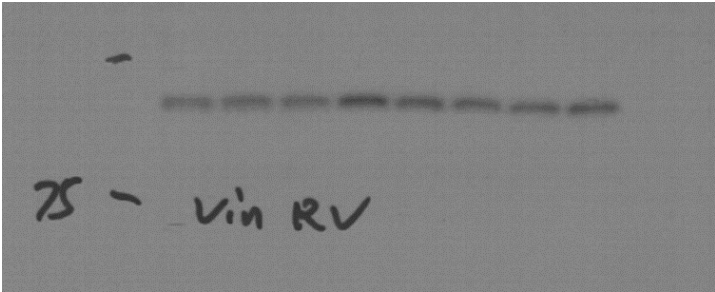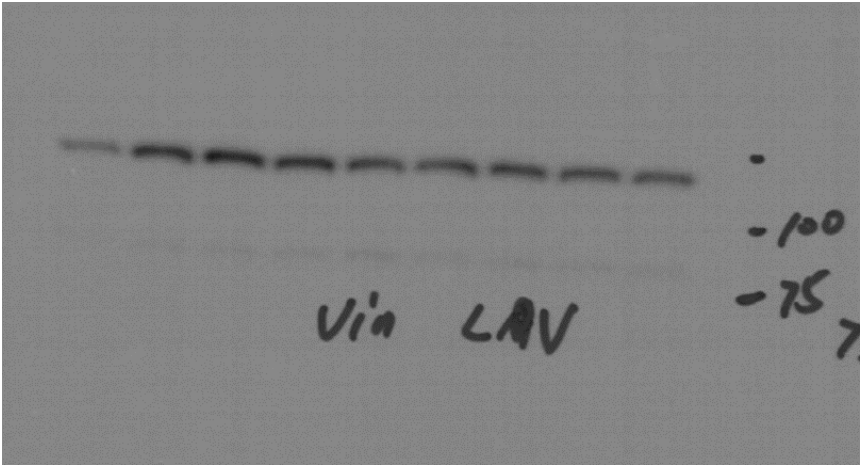

Full unedited gel for Sup. Fig 5 Panel A, CX43

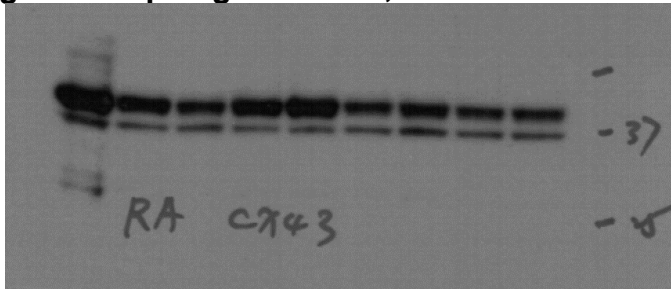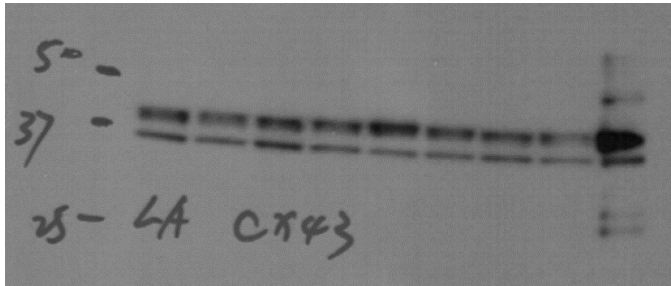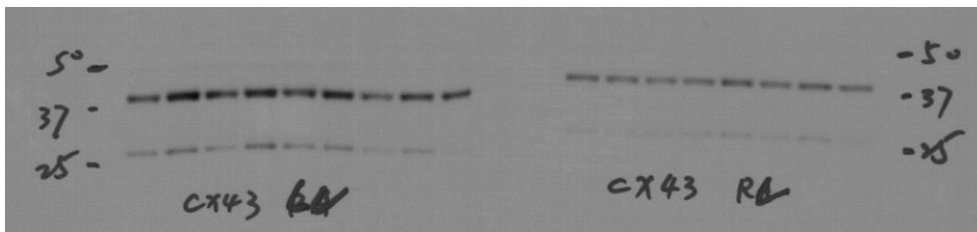

Full unedited gel for Sup. Fig 5 Panel A, p-Cx43

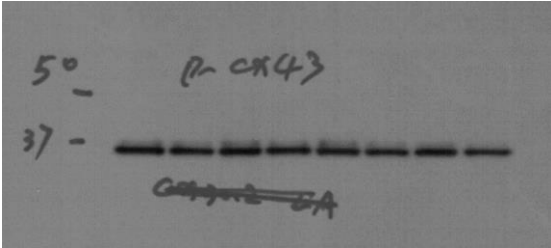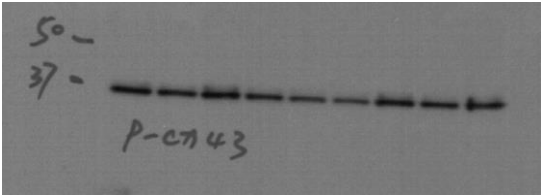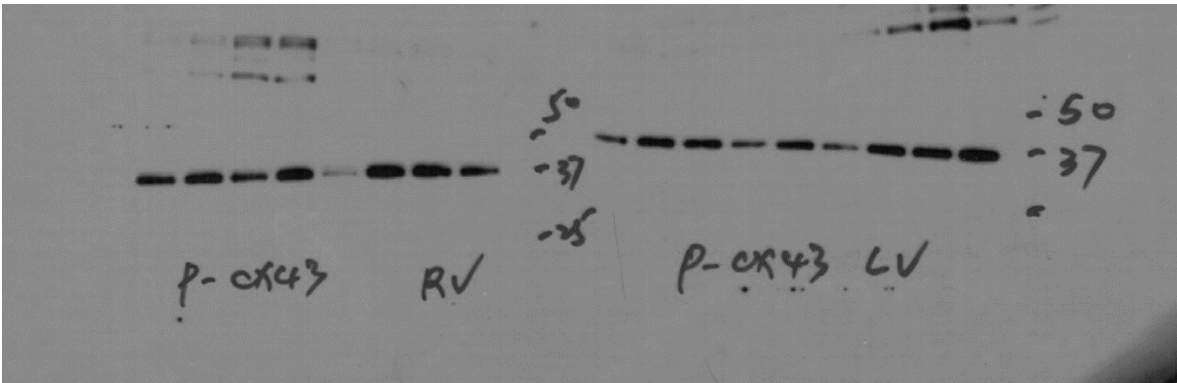

Full unedited gel for Sup. Fig 5 Panel A, GDPDH

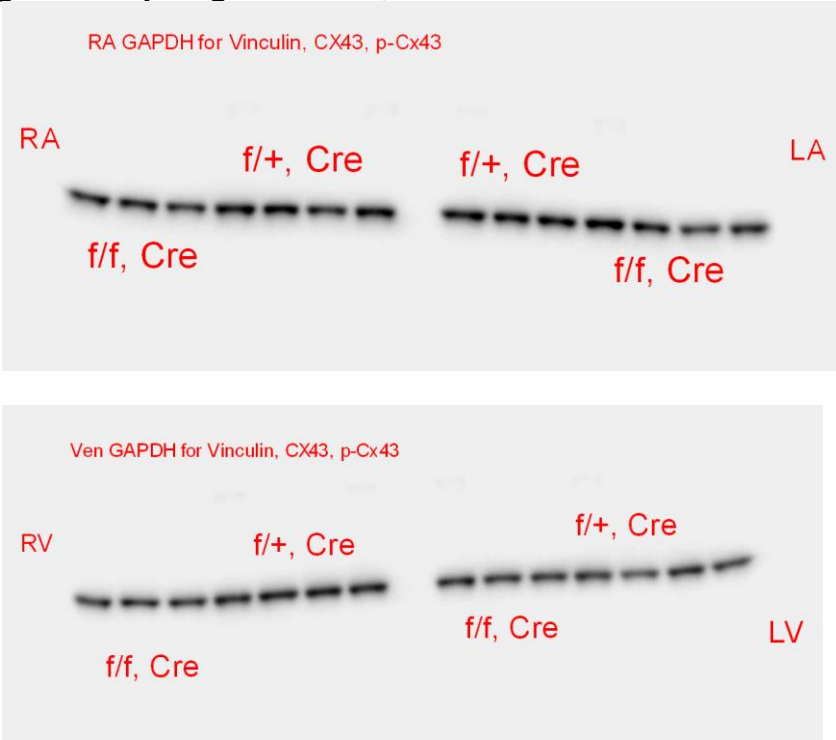

Full unedited gel for Sup. Fig 5 Panel A,  $\beta$ -Catenin

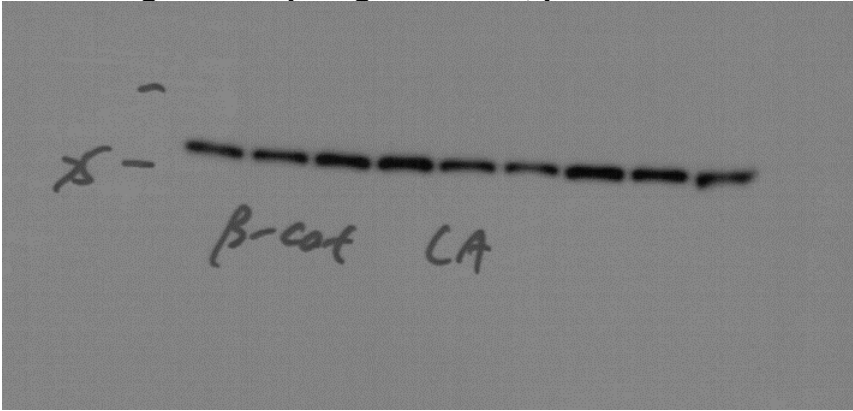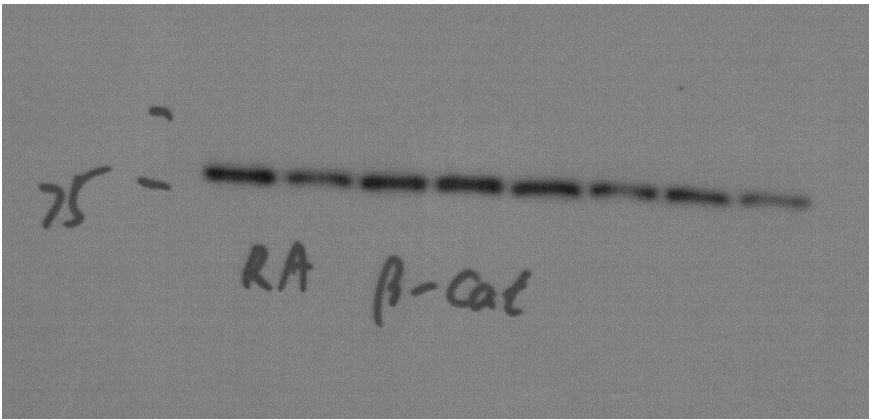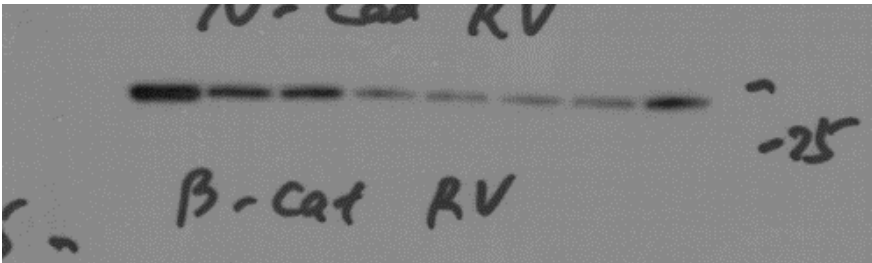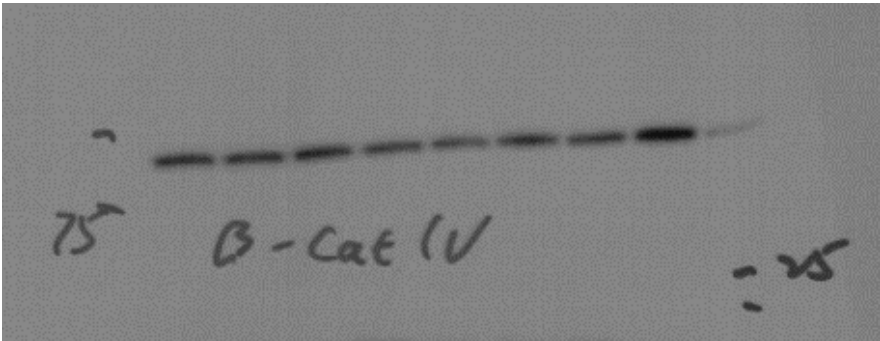

Full unedited gel for Sup. Fig 5 Panel A, Cx30.2

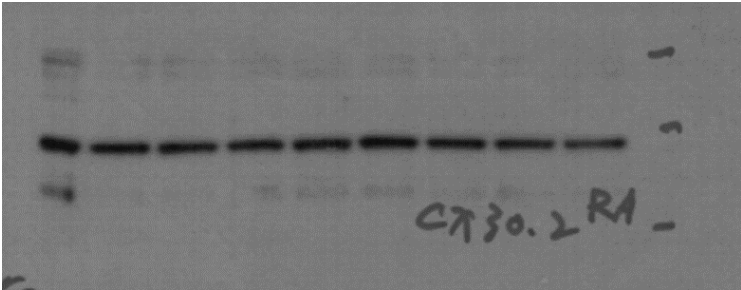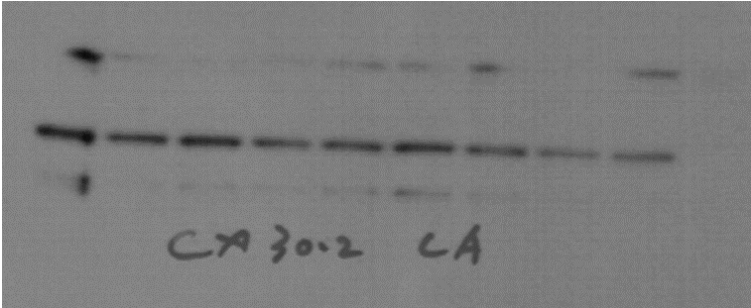

Full unedited gel for Sup. Fig 5 Panel A, GAPDH

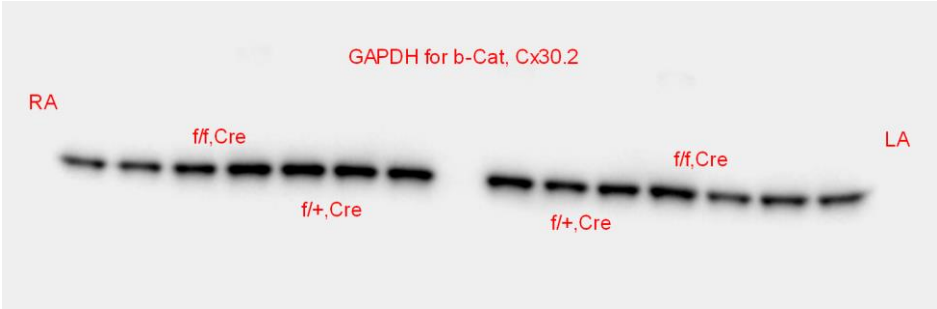

Full unedited gel for Sup. Fig 5 Panel A, N-Cad

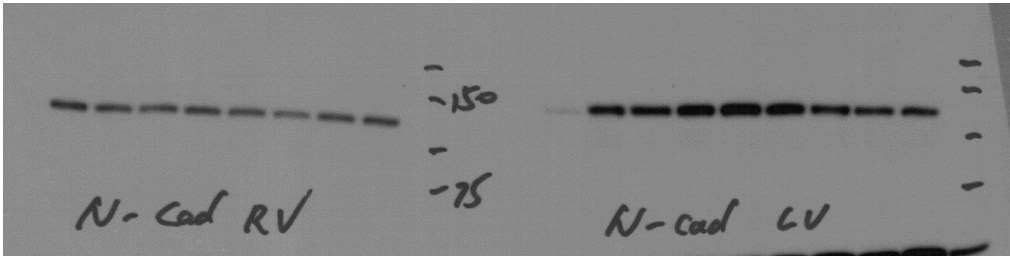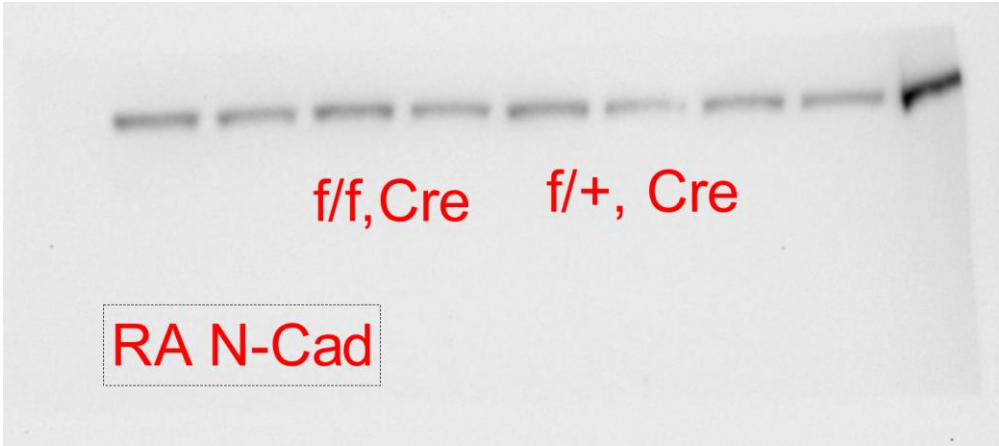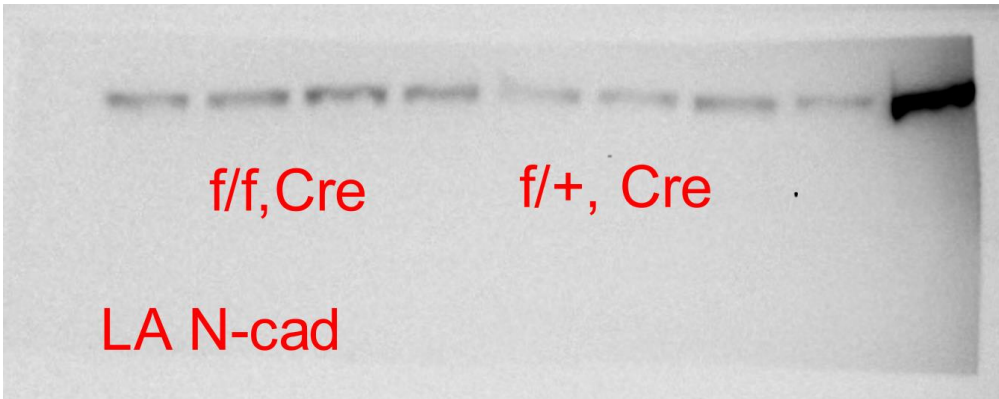



Full unedited gel for Sup. Fig 5 Panel A, Y-Catenin

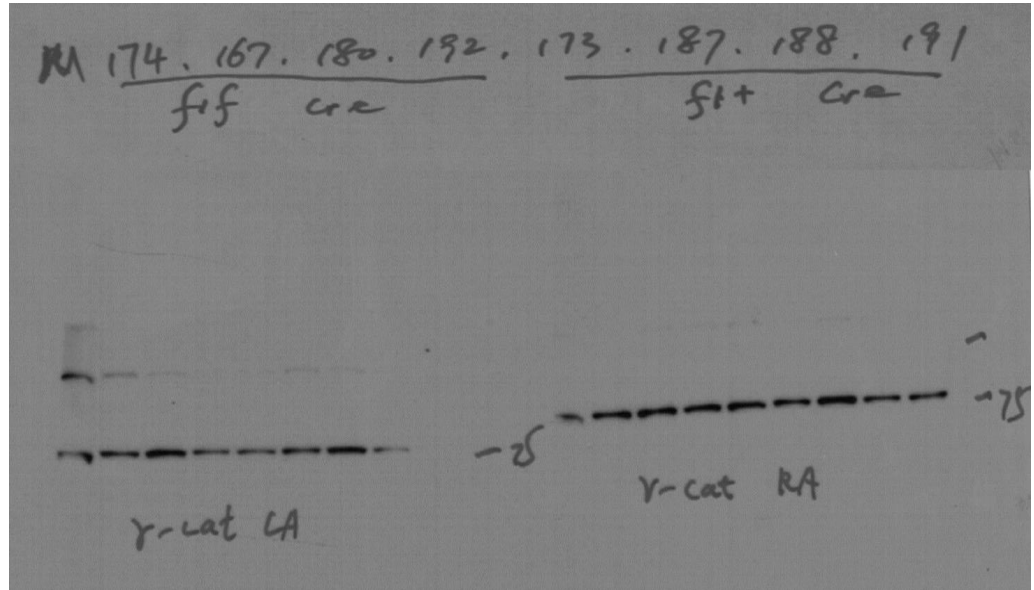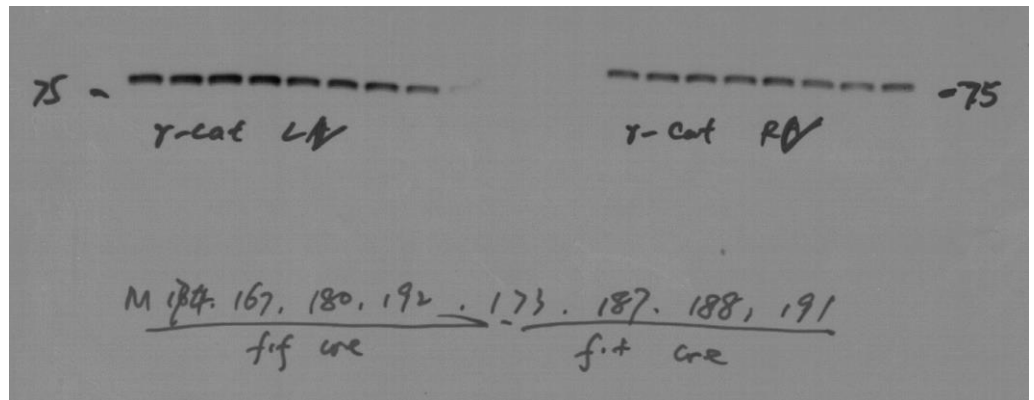

Full unedited gel for Sup. Fig 5 Panel A, Cx40

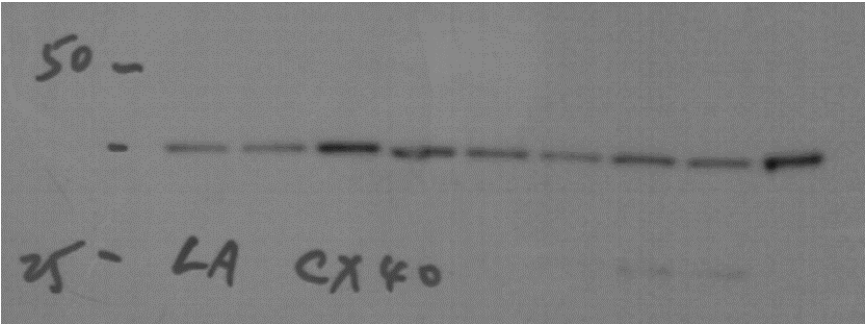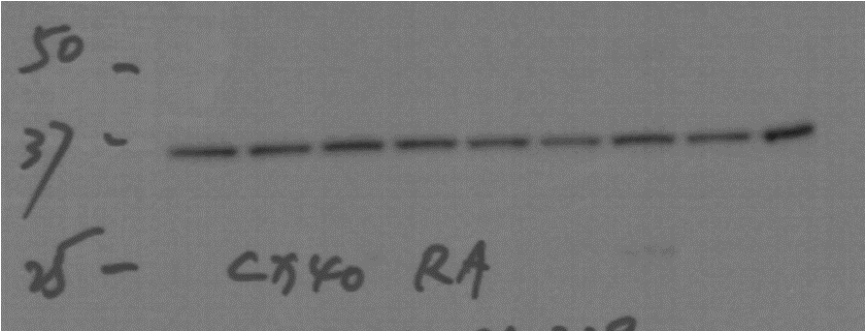

Full unedited gel for Sup. Fig 5 Panel A, GAPDH

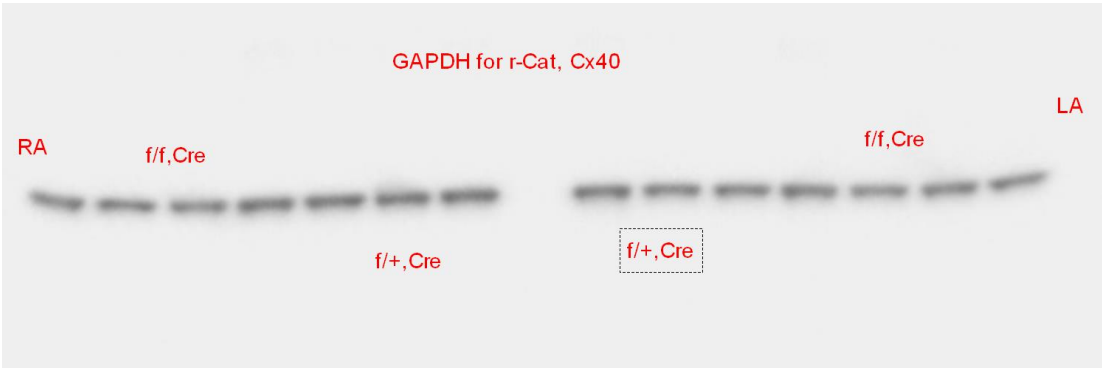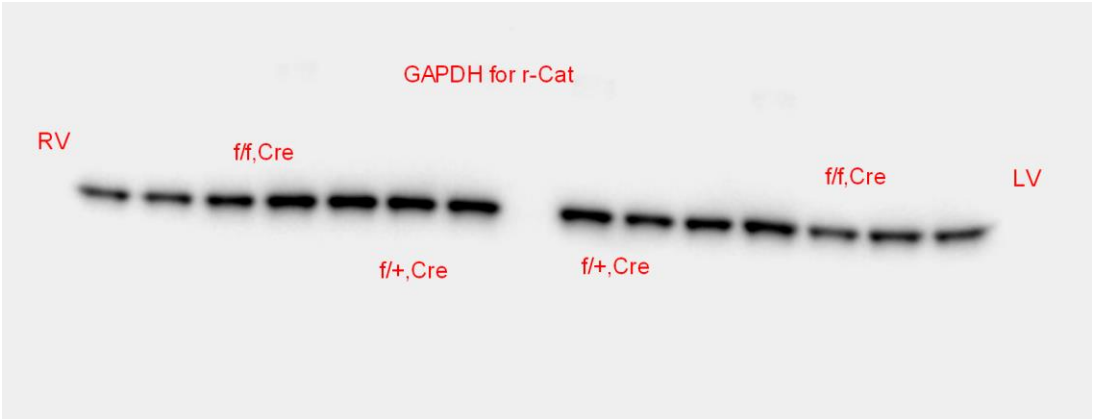

Full unedited gel for Sup Fig 9 Panel A, LA & LA

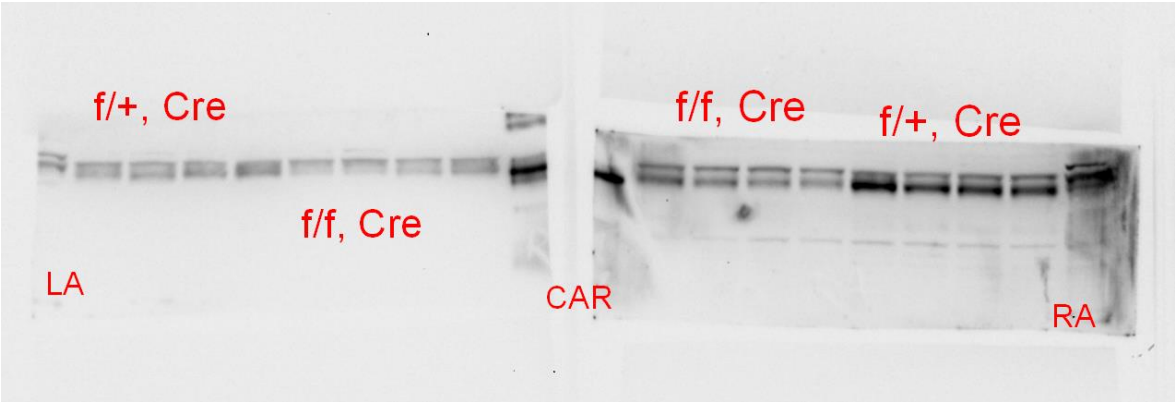

Full unedited gel for Sup Fig 9 Panel A, RV & LA

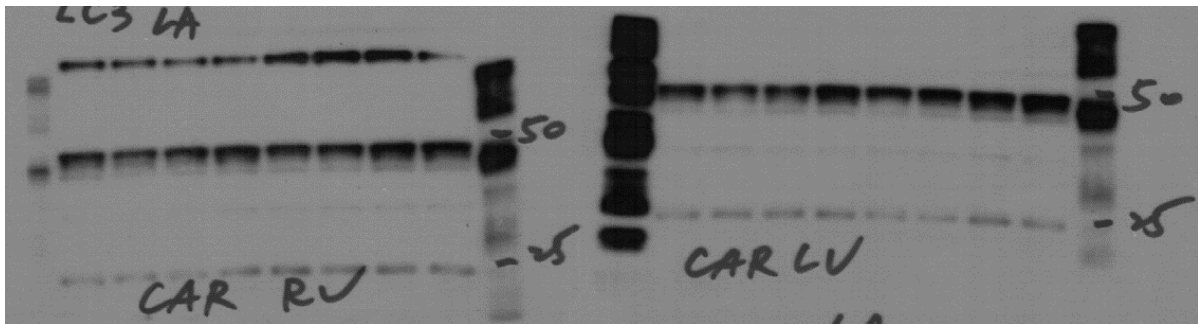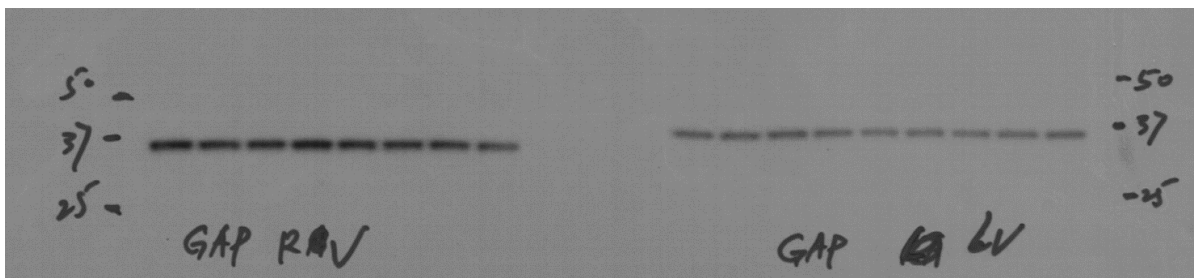

Supplement: NIHMS1589563-supplement-315539_Uncut_Gel_Blots.pdf [file NIHMS1589563-supplement-315539_Uncut_Gel_Blots.pdf]
